# Supplementary material for: Increase in foreign body and harmful substance ingestion and associated complications in children: a retrospective study of 1199 cases from 2005 to 2017
Source: Springer Nature journal article supplement (doi:10.1186/s12887-020-02444-8), 2020-12-01
Supplement: MOESM1 [file 18700344]

# Supplemental figure 1

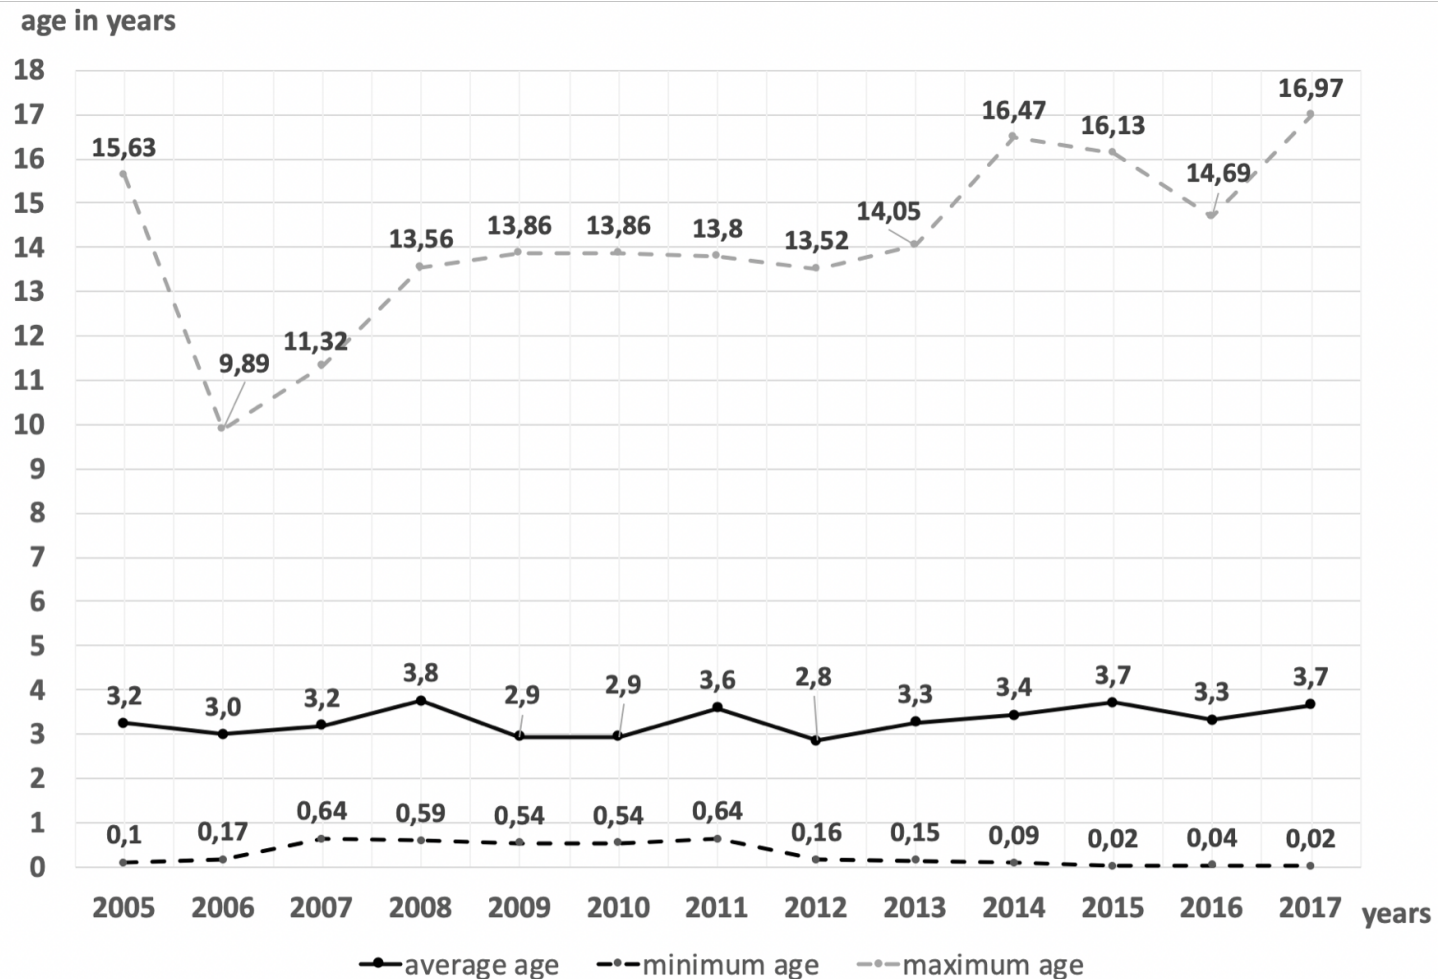

Annual age distribution from 2005 to 2017 of the 1199 children presenting with food bolus impaction, ingestion of foreign bodies or chemical substances at the Department of Pediatrics and adolescent Medicine, University Medical Center Ulm, Germany. Annual mean age (black line), minimal (dashed black line) and maximum age (dashed grey line) are indicated.
