# Supplementary material for: Increase in foreign body and harmful substance ingestion and associated complications in children: a retrospective study of 1199 cases from 2005 to 2017
Source: Springer Nature journal article supplement (doi:10.1186/s12887-020-02444-8), 2020-12-01
Supplement: MOESM2 [file 18700344]

## Supplemental figure 2

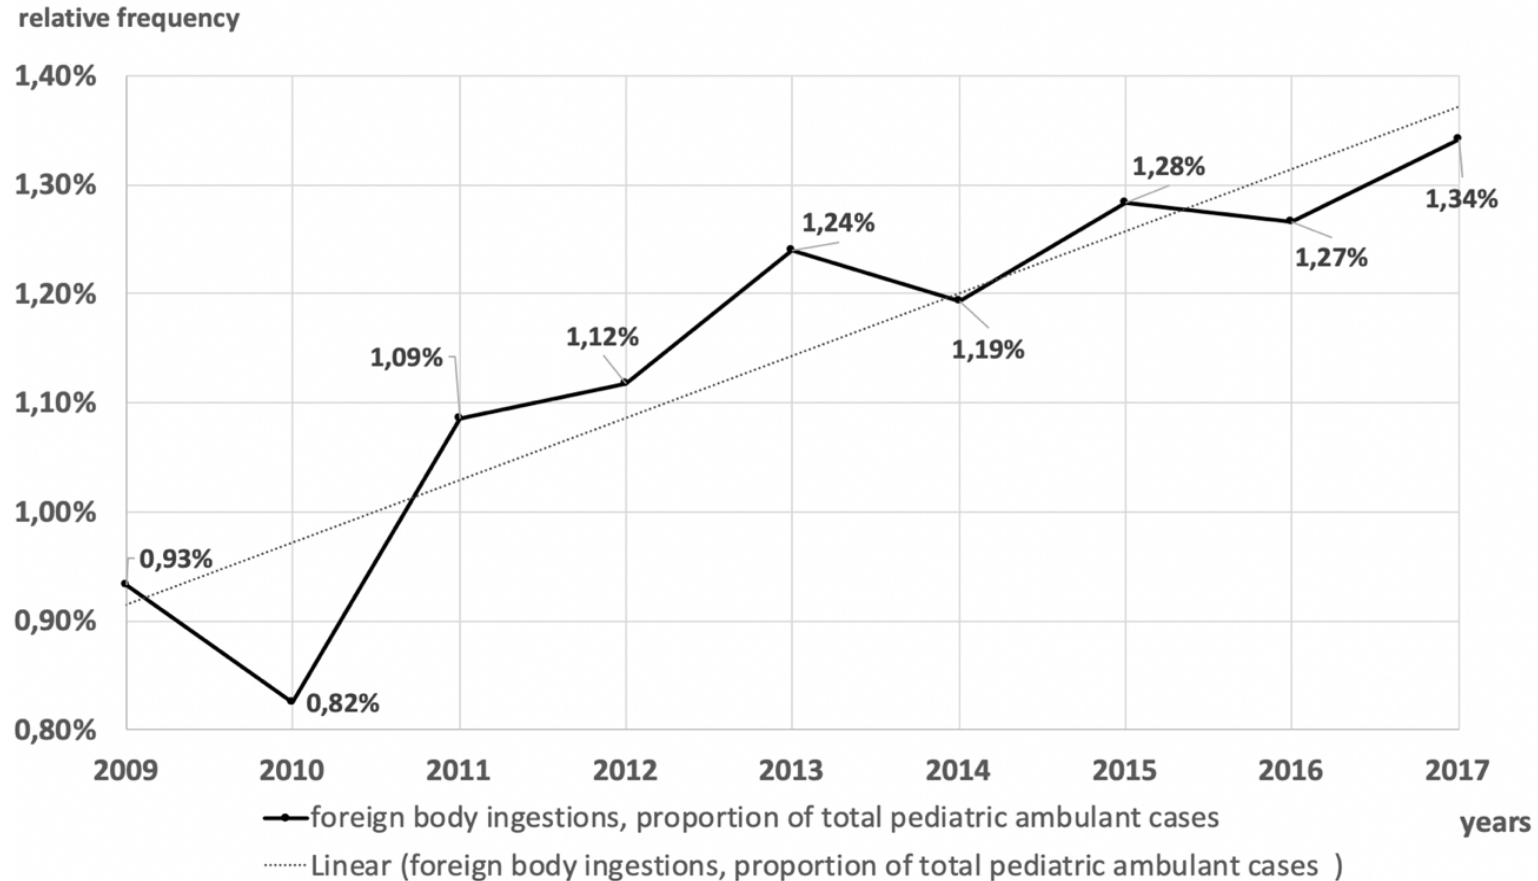

Annual percentage of cases (black line) presenting with food bolus impaction, ingestion of foreign bodies or chemical substances of all cases presented at the Emergency Department from 2009 to 2017. Linear regression analysis (grey dotted line) revealed a significant raise of this percentage over time ( $R^2=0.83$ ;  $\beta=0,912$ ;  $p=0.001$ ).
